1           **Whole genome duplication in coast redwood (*Sequoia sempervirens*) and its**  
2           **implications for explaining the rarity of polyploidy in conifers**

3           Alison Dawn Scott, Noah Stenz, David A. Baum

4           Department of Botany, University of Wisconsin, Madison, 430 Lincoln Dr., Madison WI 53706

5           **SUMMARY**

- 6           • Whereas polyploidy is common and an important evolutionary factor in most land  
7           plant lineages it is a real rarity in gymnosperms. Coast redwood (*Sequoia*  
8           *sempervirens*) is the only hexaploid conifer and one of just two naturally  
9           polyploid conifer species. Numerous hypotheses about the mechanism of  
10          polyploidy in *Sequoia* and parental genome donors have been proffered over the  
11          years, primarily based on morphological and cytological data, but it remains  
12          unclear how *Sequoia* became polyploid and why this lineage overcame an  
13          apparent gymnosperm barrier to whole-genome duplication (WGD).
- 14          • We sequenced transcriptomes and used phylogenetic inference, Bayesian  
15          concordance analysis, and paralog age distributions to resolve relationships  
16          among gene copies in hexaploid coast redwood and its close relatives.
- 17          • Our data show that hexaploidy in the coast redwood lineage is best explained by  
18          autopolyploidy or, if there was allopolyploidy, this was restricted to within the  
19          Californian redwood clade. We found that duplicate genes have more similar  
20          sequences than would be expected given evidence from fossil guard cell size  
21          which suggest that polyploidy dates to the Eocene.
- 22          • Conflict between molecular and fossil estimates of WGD can be explained if  
23          diploidization occurred very slowly following whole genome duplication. We  
24          extrapolate from this to suggest that the rarity of polyploidy in conifers may be  
25          due to slow rates of diploidization in this clade.

26  
27          **KEYWORDS:** whole genome duplication, polyploidy, *Sequoia sempervirens*, conifer,  
28          gymnosperm

29  
30  
31

## 32 INTRODUCTION

33 Polyploidy has profound long- and short-term genetic consequences (Adams & Wendel,  
34 2005; Otto & Whitton, 2000; etc.), and facilitates adaptive evolution (Soltis et al., 2008;  
35 etc). Studies of genome sequences, expressed genes, and cytogenetics suggest that all  
36 land plant lineages have experienced polyploidization in their evolutionary history,  
37 though clades differ in the extent of recent whole genome duplication  
38 (neopolyploidization). While there are thousands of neopolyploid mosses, ferns and  
39 angiosperms, the phenomenon is relatively rare in gymnosperms, and especially conifers.  
40 There are only two polyploid conifer species: alerce, *Fitzroya cupressoides* (4x), and  
41 coast redwood, *Sequoia sempervirens* (6x). Why is polyploidy so rare in conifers? Does it  
42 reflect rare formation of polyploid individuals, for example due to a lack of unreduced  
43 gametes, or another barrier to allopolyploid formation? Or, do polyploid taxa form in  
44 gymnosperms, but fail to give rise to successful clades? To shed light on these questions,  
45 we studied the evolutionary history of coast redwood with the goal of determining when  
46 polyploidy occurred and whether it entailed allopolyploidy.

47

48 Coast redwoods are long-lived trees (some over 2,000 years; Burns & Honkala, 1990)  
49 that thrive in the foggy coastal forests of central and northern California. Coast redwoods  
50 are among the world's tallest living trees (up to 115 meters; Ishii et al., 2014). *Sequoia* is  
51 a monotypic genus whose closest relatives are the giant sequoia of the Californian Sierra  
52 Nevada (*Sequoiadendron giganteum*) and the Chinese dawn redwood (*Metasequoia*  
53 *glyptostroboides*). Though the three modern redwood species have distinct ranges, fossil  
54 data suggest that diverse redwood lineages were widely distributed across the Northern  
55 Hemisphere from the Cretaceous onwards (Miller, 1977). The oldest redwood fossils are  
56 from South Manchuria (present-day China) and Boulogne-sur-Mer (northern France) and  
57 date back to the mid-to-late Jurassic, suggesting the redwood clade is at least 146 million  
58 years old (Zeiller and Fliche, 1903; Endo, 1951).

59 *Sequoidendron* and *Metasequoia* are diploids with  $2n=22$  (Schlarbaum and Tshuchiya,  
60 1984). Hirayoshi and Nakamura (1943) first determined the correct chromosome number  
61 of *Sequoia* and proved that it is a hexaploid with  $2n=66$ . Hexaploidy in *Sequoia* was later  
62 corroborated by Stebbins (1948), Saylor and Simons (1970) and Ahuja and Neale (2002).

63 Relying on the well-known correlation between guard cell size and genome size (e.g.,  
64 Beaulieu et al., 2008), Miki and Hikita (1951) studied stomatal guard-cell size in Pliocene  
65 fossils of *Metasequoia* and *Sequoia*. As fossil guard cells were the same size as extant  
66 guard cells, Miki and Hikita concluded *Sequoia* has been hexaploid since at least the  
67 Pliocene (2.5-5 million years ago). This estimate was pushed back significantly by Ma et  
68 al. (2005), who describe fossils from the Eocene (33-53mya) with guard cells of a size  
69 taken to indicate polyploidy.

70 Morphological similarities among modern redwoods led to hypotheses of allopolyploidy  
71 in *Sequoia* involving hybridization between extinct diploid *Sequoia* and ancestors of  
72 either *Metasequoia* (Stebbins, 1948) or *Sequoiadendron* (Doyle, 1945). Despite the  
73 distance among their modern ranges, the overlap in fossil distributions of *Sequoia*,  
74 *Sequoiadendron*, and *Metasequoia* make this hypothesis plausible. Another hypothesis is  
75 that an extinct member of the Taxodiaceae, perhaps a member of *Taxodium*, contributed  
76 to the hexaploid genome of *Sequoia* (Stebbins, 1948; Saylor and Simons, 1970). Ahuja  
77 and Neale (2002), in contrast, suggested that the “missing” parent of *Sequoia* may have  
78 been a member of the *Cryptomeria*, *Taiwania*, or *Athrotaxis* lineages.

79 Before the advent of molecular phylogenetics, auto- and allopolyploids were  
80 distinguished by observing chromosome behavior during meiosis. Autopolyploidy  
81 (generally interpreted as occurring within a single species) and allopolyploidy (involving  
82 hybridization among species) represent extremes of a spectrum. Autopolyploids have  
83 multiple sets of very similar homologous chromosomes, which tends to manifested  
84 cytogenetically as the formation of multivalents (e.g. groups of four or six  
85 chromosomes). Allopolyploids, in contrast, arise from the fusion of divergent genomes  
86 which, in the extreme case results in bivalent formation by each homologous  
87 chromosome, as observed in diploid organisms. However, chromosome pairing at  
88 meiosis is rarely definitive as allopolyploidy can result in multivalent formation among  
89 homeologs if hybridizing species are closely related, and bivalent formation is eventually  
90 reestablished following autopolyploidy by the process of diploidization (Ramsey and  
91 Schemske, 2002; Parisod et al., 2010).

92

93 In addition to cytogenetic lines of evidence, segregation patterns can be useful to  
94 distinguish auto- and allopolyploids. An autopolyploid forming multivalents at meiosis  
95 will produce equal frequencies of all possible allele combinations. In the case of *Sequoia*,  
96 this pattern is called hexasomic inheritance. Allopolyploids do not typically form  
97 multivalents at meiosis, resulting in simple disomic inheritance (as seen in diploids).  
98 Again, these are only the most extreme possibilities, as both the diploidization process  
99 and polyploidy involving a mixture of similar and divergent chromosomes (i.e. segmental  
100 allopolyploidy sensu Stebbins) can lead to intermediate inheritance patterns.

101

102 Studies of meiotic chromosome pairing in *S. sempervirens* reported a mixture of bivalents  
103 and multivalents (Stebbins, 1948; Schlarbaum and Tsuchiya, 1984; Ahuja and Neale,  
104 2002). This led Stebbins (1948) and Schlarbaum and Tsuchiya (1984a, b) to suggest that  
105 hexaploidy involved both auto- and allopolyploidy. A similar result was obtained by  
106 Rogers (1997), who used allozymes to study inheritance patterns in *Sequoia*. However,  
107 neither the pairing nor genetic data are sufficient to distinguish segmental allopolyploidy  
108 from autopolyploidy followed by partial diploidization. We set out to use modern  
109 genomic approaches to revisit the evolutionary history of polyploidy in *S. sempervirens*  
110 and see if, by doing so, we could also gain insights into why polyploidy is so rare in  
111 gymnosperms.

112

## 113 **MATERIALS AND METHODS**

### 114 *Transcriptome sequencing and assembly*

115 Total RNA was extracted from foliage samples of *S. sempervirens*, *S. giganteum*, *M.*  
116 *glyptostroboides*, and the outgroup *Thuja occidentalis* (eastern white cedar) with a  
117 CTAB/Chisam extraction protocol followed by Qiagen RNeasy cleanup. Illumina TruSeq  
118 cDNA libraries were prepared and sequenced on an Illumina HiSeq 2000 with 100bp  
119 paired-end reads at either the UW Biotech Center (Madison, WI) or at the SciLife  
120 Laboratory (Stockholm, Sweden).

121

### 122 *Sequence analysis and alignment*

123 We assembled raw reads *de novo* with Trinity vers. 2014-07-17 (Grabherr et al., 2011),  
124 with default settings and Trimmomatic processing. After assembly, contigs were  
125 translated using TransDecoder vers. 2014-07-04 (Haas et al., 2013;  
126 <http://transdecoder.sf.net>) with a minimum protein length of 100aa. Translated contigs  
127 were filtered using the Evigene pipeline vers. 2013.07.27  
128 ([http://arthropods.eugenes.org/EvidentialGene/about/EvidentialGene\\_trassembly\\_pip  
129 e.html](http://arthropods.eugenes.org/EvidentialGene/about/EvidentialGene_trassembly_pipeline.html)). Ortholog clusters shared among *S. sempervirens*, *S. giganteum*, *M.*  
130 *glyptostroboides*, and *T. occidentalis* were identified using the translated transcriptome  
131 assemblies by ProteinOrtho ver. 5.11 (Lechner et al., 2011), using an algebraic  
132 connectivity cutoff of 0.25. Custom Perl scripts (available at [github.com/nstenz](https://github.com/nstenz)) were  
133 used to identify ortholog sets that contained a single copy in diploids (*S. giganteum*, *M.*  
134 *glyptostroboides*, and *T. occidentalis*) and between one and three copies in the hexaploid  
135 *S. sempervirens*. As these putatively single-copy protein-coding sequences show marked  
136 conservation among species, we assumed that allelic variants would generally be  
137 combined into a single contig. We used MUSCLE v. 3.8.13, 64bit (Edgar, 2004a,b), with  
138 default alignment settings to align the ortholog sets at the protein level before using a  
139 custom PERL script to generate the corresponding nucleotide alignment.

140

#### 141 *Single-variant gene trees and concordance analyses*

142 For each orthogroup that included only one sequence variant in *S. sempervirens* we  
143 estimated phylogenetic trees using MrBayes vers. 3.2.2 64bit (Huelsenbeck & Ronquist,  
144 2001; Ronquist & Huelsenbeck, 2003) with the settings: nst = 6; rates = invgamma; ngen  
145 = 1.1 million; burnin = 100,000; samplefreq = 40; nruns = 4; nchains = 3; temp = 0.45;  
146 swapfreq = 10. BUCKy vers. 1.4.4 (Ané et al., 2007; Larget et al., 2010) was then used to  
147 estimate the proportion of genes that have each possible resolution in the redwood clade  
148 while taking account of uncertainty in individual gene trees. Post-burnin posterior  
149 distributions from MrBayes were combined in BUCKy for 1 million generations with  $\alpha =$   
150 1. All trees were rooted on the outgroup, *Thuja occidentalis*.

151

#### 152 *Density distribution of $K_s$ estimates*

153 To build an age distribution of  $K_s$  (the average number of synonymous substitutions per  
154 synonymous site) within each transcriptome we identified duplicate genes using custom  
155 Perl scripts (available at [github.com/nstenz](https://github.com/nstenz)). Assembled contigs were translated using  
156 TransDecoder with a minimum protein length of 100aa, as above. Duplicate genes were  
157 identified using BLAT (Kent 2002) on translated contigs and then duplicate gene pairs  
158 were aligned and back translated into their corresponding nucleotide sequence. We  
159 estimated  $K_s$  on each pair of nucleotide alignments using  $K_aK_s$  calculator (model GY;  
160 Zhang et al., 2006). We excluded  $K_s$  values greater than 2 to avoid the effects of  $K_s$   
161 saturation, and plotted the resulting  $K_s$  values in a density plot in R (R core team, 2013).  
162 To identify significant features of the  $K_s$  frequency distributions we used SiZer  
163 (Chaudhuri and Marron, 1999).

164

165

#### 166 *Multi-variant gene trees and tree-based $K_s$ estimates*

167 For alignments containing a single variant in diploid taxa and two or three variants in  
168 hexaploid *Sequoia*, we estimated phylogenetic trees with raxml vers. 8.1.20 (100  
169 bootstrap replicates; GTRGAMMA; Stamatakis, 2006). We then used PAML (Yang,  
170 1997) to obtain a tree-based estimate of  $K_s$ . PAML calculates branch lengths along the  
171 ML tree using a model that estimates the rate of synonymous and non-synonymous  
172 substitutions ( $D_s$  and  $D_n$ , respectively) separately for each branch. We imposed a  
173 molecular clock assumption (clock=1) to obtain an ultrametric tree. By multiplying a  
174 branch's length by its  $D_s$  and summing over intervening branches between two tips we  
175 could obtain an estimate of the patristic  $K_s$  distance between *Sequoia* homeologs and how  
176 this compares to the  $K_s$  of copies from different species.

177

178 In order to obtain an approximate date for gene duplication, we divided the depth of the  
179 gene duplication in  $K_s$  units by an average mutation rate for conifers of  $0.68 \times 10^{-9}$   
180 synonymous substitutions per synonymous site per year (Buschiazzo et al., 2012).  
181 *Sequoia* is hexaploid, so at least two whole genome duplications must have occurred in  
182 the past. As each whole genome duplication event is expected to yield a normal  
183 distribution of  $K_s$  values, we used EMMIX v.1.3 (Mclachlan et al., 1999) to fit a mixture

184 model of normal distributions as a way to assign putative homeologs to each duplication  
185 event and estimate their ages. We allowed EMMIX to fit 1-2 normal distributions, with  
186 the optimal model selected based on AIC and BIC scores.

187

## 188 RESULTS

189 Our *de novo* transcriptome assemblies ranged from 70 to 101mbp in length (Table 1).

190 Assembled contigs per species ranged from 80,126 to 128,005.

191

192 Table 1: Assembly statistics

| Taxon                               | Raw reads<br>(paired end) | Assembly length<br>(mbp) | Contigs | N50   |
|-------------------------------------|---------------------------|--------------------------|---------|-------|
| <i>Sequoia sempervirens</i>         | 55,052,935                | 85.6                     | 128,005 | 1,118 |
| <i>Sequoiadendron giganteum</i>     | 56,665,524                | 101.3                    | 115,519 | 1,619 |
| <i>Metasequoia glyptostroboides</i> | 29,502,075                | 78.6                     | 83,120  | 1,668 |
| <i>Thuja occidentalis</i>           | 31,116,702                | 70.0                     | 80,126  | 1,607 |

193

194 Assuming synonymous substitutions happen at a constant rate over time,  $K_s$  can be used  
195 as a proxy for the age of duplicate genes. To estimate the distribution of pairwise  $K_s$   
196 distance within each genome, we identified all duplicate genes, which numbered 33,544,  
197 39,236, and 26,485, in *S. sempervirens*, *S. giganteum*, and *M. glyptostroboides*,  
198 respectively. Paralog age distribution plots for all three taxa revealed a peak at a  $K_s \approx 1.5$ ,  
199 of which those for *S. sempervirens*, *S. giganteum* are shown in Fig. 1. Allowing for the  
200 approximate nature of these calculations, this peak likely corresponds to the seed plant  
201 whole genome duplication previously dated at 319 Ma (Jiao et al., 2011). Despite the  
202 expectation that hexaploid *Sequoia* would have at least one other, much younger peak  
203 corresponding to a polyploidization event in perhaps the Eocene (Ma et al., 2005), this  
204 was not visible in the age distribution plots (Fig. 1). Results from SiZer also did not  
205 indicate any significant peak unique to the *Sequoia*  $K_s$  plot.

206

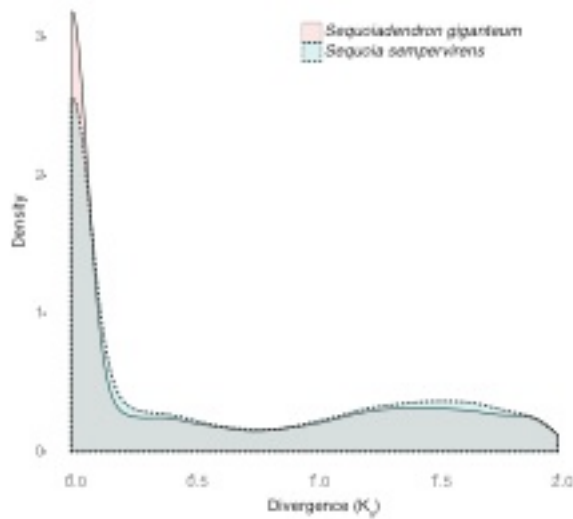

208

209 Figure 1: Density distribution of pairwise Ks between duplicate genes in *Sequoia* (pink) and  
210 *Sequoiadendron* (cyan).

211

212 To distinguish the evolutionary relationships among redwoods and look for evidence of  
213 ancestral hybridization, we used Bayesian concordance analysis and estimated genomic  
214 support for each of three possible topologies for an unrooted four-taxon tree. First we  
215 built individual gene trees from 7,819 ortholog groups that each had one sequence variant  
216 in each diploid species (*Sequoiadendron*, *Metasequoia*, *Thuja*) and one, two, or three  
217 sequence variants in the hexaploid, *Sequoia*. Alignment lengths in this set varied from  
218 301-5,736 bp, with a median of 1,104. Of these alignments 7,602 included a single  
219 *Sequoia* copy, whereas 217 included one or two *Sequoia* sequence variants. Among the  
220 7,602 alignments that included a single copy in *S. sempervirens* the most frequently  
221 supported topology placed *S. sempervirens* sister to *Sequoiadendron* (Fig. 2) with a  
222 concordance factor (CF; Baum 2007) mean estimate of 0.79 and a 95% credibility  
223 interval of 0.78-0.80. The two minor topologies (*Sequoia* + *Metasequoia*; *Metasequoia* +  
224 *Sequoiadendron*) had concordance factors of 0.10(0.09-0.11) and 0.11(0.10, 0.12),  
225 respectively (Fig. 2). These results show that, if *Sequoia* arose from allopolyploidy, it  
226 only involved genome donors in the Californian redwood clade (i.e., the clade that  
227 includes *S. sempervirens* and *Sequoiadendron*). However, autoploidy is also a possibility.

228



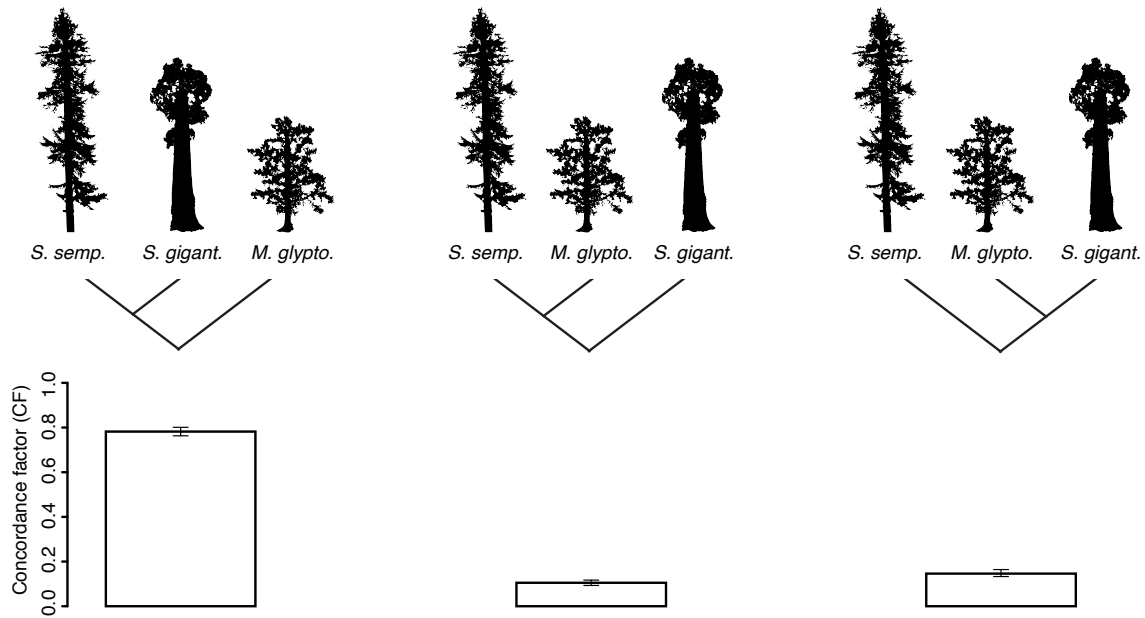

Figure 2: Bayesian concordance analysis of 7,602 gene trees. For each of three possible topologies, the concordance factor (proportion of loci in the sample having the clade) and its 95% credibility interval are shown.

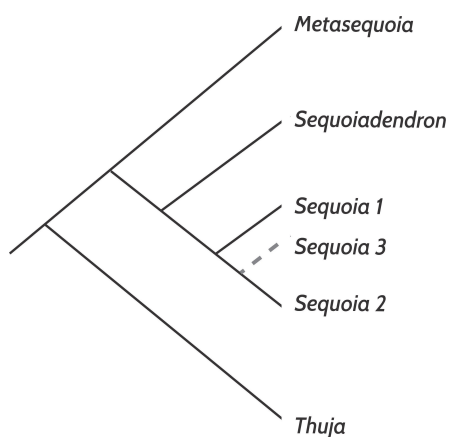

239 Figure 3: Cladogram summarizing 184 gene trees as estimated by MrBayes.

240 In order to obtain estimates for the divergence of *Sequoia* duplicates relative to  
241 interspecies divergences and to re-evaluate evidence for allopolyploidy within the

242 Californian redwood clade, we estimated phylogenetic trees for all genes with more than  
243 one sequence variant in *Sequoia*. A total of 217 genes were present in two or three copies  
244 in *S. sempervirens*. The optimal tree for 186 of these alignments (85.7%) showed  
245 monophyly of the *S. sempervirens* copies with *Sequoia* sister to *Sequoiadendron* (Fig. 3),  
246 with 97% of these trees well-supported (i.e., having a bootstrap > 0.70). The remaining  
247 31 genes (14%) either contradicted monophyly of *S. sempervirens* copies, supporting  
248 several other possible relationships, or lacked clear resolution of species relationships.

249

250 Based on ML estimates using a codon model in PAML, we could calculate the patristic  
251 Ka and Ks distances between each pair of tips for on each genes tree. Doing this on the  
252 176 well-supported gene trees that yielded a monophyletic *Sequoia*, average phylogenetic  
253 K<sub>s</sub> among *Sequoia* gene copies was 0.013. This was approximately one-third of the Ks  
254 separating *Sequoia* sequences from other redwoods (Figure 4).

255

256 **Figure 4: Tree-based divergence estimates in Ks**

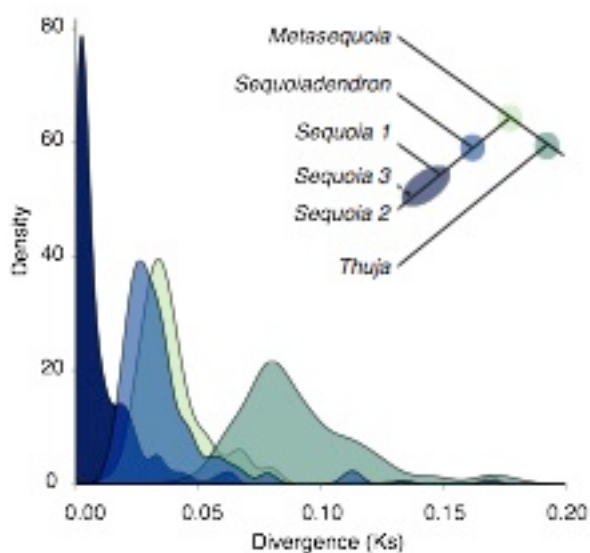

257

258 Density distribution of divergence estimates (in Ks). For Distributions are colored to indicate  
259 corresponding nodes on the tree.

260

261

262

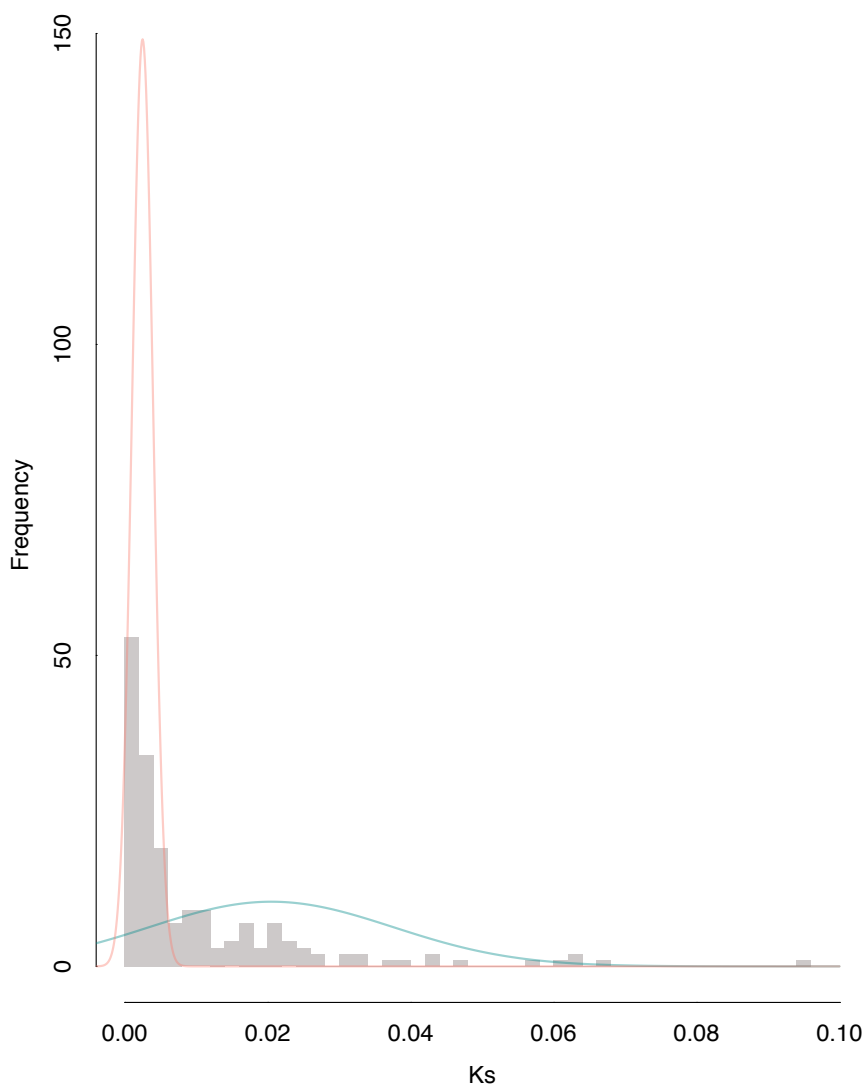

263

264 Figure 5: Age distribution of *Sequoia* variants. Colored lines denote normal distributions fit with EMMIX.

265

266 We tested whether the patristic Ks estimates between *S. sempervirens* copies are sampled  
267 from one or two normal distributions. If hexaploidy arose from two sequential WGD  
268 events, there should be two, distinct normal distributions. We used EMMIX to fit a  
269 mixture model of normal distributions to the PAML Ks estimates. Based on AIC and BIC  
270 scores, the presence of two Gaussian distributions provides a better fit to the K<sub>s</sub> distance  
271 data. Figure 5 shows the best fitting pair of distributions. Although it is difficult to  
272 reliably translate K<sub>s</sub> into absolute age, using a generic average mutation rate for conifers  
273 of  $0.68 \times 10^{-9}$  synonymous substitutions per site per year (Buschiazzi et al., 2012), these  
274 peaks correspond to ~3 Ma and 10 Ma.

275

276 **DISCUSSION**

277

278 **Transcriptome sequencing in the redwoods supports a sister group relationship**  
279 **between *Sequoia* and *Sequoiadendron*.**

280 Bayesian concordance analysis of single copy genes overwhelmingly supports  
281 *Sequoiadendron* as the closest relative of *Sequoia*. This conclusion is in agreement with  
282 decades of previous work based on morphology, karyotype, and chloroplast sequence  
283 data (e.g. Brunsfield et al., 1994; Gadek et al., 2000; Kusumi et al., 2001).

284

285 We found genes supporting two minor topologies, one with a *Sequoia*-*Metasequoia* clade  
286 and the other with a *Sequoiadendron*-*Metasequoia* clade. These discordant topologies  
287 could be due to incomplete lineage sorting (ILS), which arises when multiple gene copies  
288 (or alleles) persist between sequential splits in a population tree. In this case, the two  
289 minor trees have similar concordance factors, 0.010 and 0.11, and their associated  
290 credibility intervals overlap. This pattern is consistent with ILS, which predicts that the  
291 alternative minor topologies should have equal CFs (Baum 2007). Furthermore, given a  
292 concordance factor of 0.80, coalescent theory would predict that *Sequoia*-  
293 *Sequoiadendron* clade is subtended by a population lineage whose duration was  $\sim 1.22 N_e$   
294 generations, where  $N_e$  is the effective population size (Allman et al., 2011; Larget et al.  
295 2011). However, it is also possible that the internal branch is considerably longer and  
296 discordance is due to other factors such as mistaken orthology. The fact that the two  
297 minor histories have similar concordance factors tends to argue against introgression or  
298 hybridization as an important phenomenon in the group.

299

300 **Hexaploidy in *Sequoia* did not involve hybridization among extant redwood**  
301 **lineages.**

302 Our phylogenetic results support an autopolyploid origin for hexaploid *Sequoia*, with no  
303 evidence to support hybridization among modern redwood lineages. Single-copy trees  
304 convey strong support for *Sequoiadendron* as the closest relative of *Sequoia*, suggesting  
305 there was no genome contribution from *Metasequoia*. The lack of evidence that

306 *Metasequoia* was involved with the polyploid origins of *Sequoia* puts some long-held  
307 hypotheses to rest (e.g. Stebbins, 1948; Saylor & Simons, 1970). However, as these  
308 phylogenies include only one copy for hexaploid *Sequoia*, they could not distinguish  
309 between autopolyploidy within the *Sequoia* lineage or autoallopolyploidy within the  
310 *Sequoiadendron-Sequoia* clade. Single-copy trees may also be inconclusive due to  
311 extreme copy-specific expression or genome dominance, where genes from one parental  
312 genome are preferentially expressed (e.g. Woodhouse et al., 2014). Therefore, we sought  
313 additional evidence by studying orthogroups that included 2 or 3 distinct sequence  
314 variants, putatively homeologs, from *Sequoia*. Phylogenetic analyses of these  
315 orthogroups strongly support monophyly of *Sequoia* homeologs, suggesting that all gene  
316 copies in *Sequoia* originate from the same redwood lineage.

317

### 318 **Polyploidy in *Sequoia* arose relatively recently.**

319 The similarity of the  $K_s$  plots obtained from polyploid *Sequoia* and diploids  
320 *Sequoiadendron* and *Metasequoia* (Fig. 2), and specifically the lack of a recent peak  
321 restricted to *Sequoia*, is initially surprising, as these methods have been widely used to  
322 diagnose polyploidization events in numerous plant lineages (e.g. Barker et al., 2008; Jiao  
323 et al., 2011). This pattern might be expected if autopolyploidy had occurred very  
324 recently, such that the level of divergence among homeologs is not much different than  
325 that among alleles at a particular locus (Vanneste et al. 2013), but the fossil data suggests  
326 polyploidization as early as the Eocene. One possible explanation for the lack of a  
327 polyploidization peak is that only one homeolog is expressed in leaves. Such genome  
328 dominance has been observed in other polyploid species (e.g., Adams et al. 2004).  
329 However, the fact that we found many genes with two or three distinct copies in *Sequoia*  
330 but only one in each diploid argues against uniform silencing of all but one homeolog.

331

332 To further explore the history of gene duplication, we inferred trees for alignments that  
333 included one transcript in diploids and two or three from *Sequoia* and then inferred the  
334 branch lengths of this tree in  $K_s$  units. We found that  $K_s$  estimates between even the most  
335 divergent *Sequoia* homeologs were very low ( $>0.10$ ). One possible explanation is that  
336 *Sequoia* experienced a long period of multisomic inheritance following autopolyploidy

337 during which time homeologs tended to be repeatedly recombined, resulting in much  
338 lower  $K_s$  values (described in Wolfe, 2001). These observations highlight some caveats  
339 of using paralog age distribution graphs alone to infer recent polyploidization events, or  
340 to study ancient whole genome duplication events that were accompanied by extended  
341 periods of multisomic inheritance.

342

343 Fitting a mixture model of normal distributions to  $K_s$  estimates between homeologs  
344 yielded two distinct, but overlapping Gaussian distributions. This suggests two whole  
345 genome duplication events are included in our age distribution data. Using a mutation  
346 rate calibration for conifer  $K_s$  divergence, we estimated the timing of the first whole  
347 genome duplication in *Sequoia* to have occurred around 10 Ma, with the second  
348 occurring more recently, about 3 Ma. These dates are in apparent contradiction to the  
349 discovery of *Sequoia* fossils in the Eocene (33-53 Ma) with guard cells of a size taken to  
350 be indicative of polyploidy (Ma et al., 2005). One possible explanation for this  
351 discrepancy is that the mutation rate is three-fold lower in *Sequoia* (or redwoods in  
352 general) than in other conifers. However, although some redwoods may have extremely  
353 long life spans, such a great different in the rate of synonymous substitutions seems  
354 improbable.

355

356 A second possibility is that the Eocene fossils represent an independent instance of  
357 polyploidy in a closely related lineage that was misclassified as being in *Sequoia*. It is  
358 noteworthy that some plant groups that acquire the propensity to undergo polyploidy, do  
359 so repeatedly, a possible case in point being the *Ephedra* lineage, which appears to have  
360 experienced multiple whole genome duplication events (Ickert-Bond, 2003). Further  
361 evaluating this hypothesis would require measurements of guard cells in a much larger  
362 number of different aged *Sequoia* fossils from different geographic locations.

363

364 The final possible explanation for the low divergence of putative homeologs in *Sequoia* is  
365 that while autopolyploidy occurred in the Eocene (or even earlier), multisomic  
366 inheritance persisted for a long period of time, possibly even to the present for some loci.  
367 In such a case the gene duplication events we dated would not correspond to the

368 polyploidy event per se but would reflect subsequent, recombinational homogenization.  
369 This hypothesis is consistent with multivalent formation in modern *Sequoia*, and suggests  
370 a very slow diploidization process following whole genome duplication in *Sequoia*.

371

### 372 **Implications for polyploidization patterns in gymnosperms.**

373 Given what we know about polyploidy in *Sequoia*, what conclusions can we draw about  
374 patterns of polyploidization in gymnosperms overall? With the exception of *Ephedra*,  
375 instances of polyploid gymnosperms are limited to monospecific genera (e.g. *Sequoia*,  
376 *Fitzroya*), or even just to polyploid individuals within diploid species (e.g. *Juniperus x*  
377 *pfitzeriana*; Ahuja, 2005). If polyploidy in gymnosperms is associated with small clades,  
378 as seems to be the case, we can infer that polyploidy either hinders speciation or  
379 promotes extinction of gymnosperm lineages, or both.

380

381 The apparent mismatch between the inferred age of gene duplication and the timing of  
382 polyploidization as seen in the fossil record suggests an intriguing hypothesis to explain  
383 the paucity of polyploidy in gymnosperms. Perhaps diploidization happens more slowly  
384 in gymnosperms (except perhaps *Ephedra*) than in angiosperms. The main long-term  
385 benefits of polyploidy (potential sub- and neo-functionalization of genes) require  
386 divergence among homeologous chromosomes, which can only happen once loci are  
387 diploidized. Thus, continued multisomic inheritance precludes the emergence of any  
388 evolutionary advantage in polyploid lineages.

389

390 If polyploidy in gymnosperms is more burden than boon, the persistence of hexaploid  
391 *Sequoia* may reflect an ability to avoid extinction rather than superior fitness. In this  
392 regard it is perhaps noteworthy that *S. sempervirens* manifests some traits that might help  
393 stave off extinction, namely clonal reproduction, self-compatibility, and extreme  
394 longevity. In coast redwood populations, suckers often emerge from the base of adult  
395 trees, extending generation time (meiosis-to-meiosis) almost indefinitely. Furthermore,  
396 production of asexual stands may lead to abundant genetic selfing among clonal ramets,  
397 as coast redwoods are self-compatible (Burns & Honkala, 1990). This means that a  
398 spontaneous polyploid, perhaps gaining the transient advantage of fixed heterozygosity,

399 could spread by a combination of asexual reproduction and selfing. It is conceivable,  
400 therefore, that even after the erosion of fixed heterozygosity the lineage could persist  
401 despite never gaining the long-term advantages typically associated with polyploidy,  
402 instead suffering the concomitant problem of enlarged genome size. The only other  
403 natural polyploid in Cupressaceae, *Fitzroya cupressoides*, is a putative autotetraploid.  
404 Like *Sequoia*, *Fitzroya* is both long-lived and capable of clonal reproduction (Silla et al.,  
405 2002). Thus, while more work is needed to evaluate the occurrence of multisomic  
406 inheritance in both polyploid species (e.g. *Sequoia*, *Fitzroya*) and polyploid clones  
407 *Juniperus x pfitzeriana*, our hypothesis can both explain the rarity of neopolyploidy in  
408 gymnosperms and why *Sequoia* is an exception to this general rule.

409

#### 410 **ACKNOWLEDGEMENTS**

411 We thank Cécile Ané, Matt Johnson, and Nisa Karimi for improving this manuscript  
412 through countless discussions. Support for this project was provided by a grant to ADS  
413 and DB from Save The Redwoods League. This material is based upon work supported  
414 by the National Science Foundation Graduate Research Fellowship under Grant No.  
415 DGE-0718123 to ADS. The data analyses were partly performed using resources  
416 provided by the Swedish National Infrastructure for Computing (SNIC) at UPPMAX.

417

#### 418 **AUTHOR CONTRIBUTIONS**

419 ADS and DB designed the research and wrote the manuscript, ADS collected the data,  
420 ADS and NS analyzed the data.

421

#### 422 **REFERENCES**

423

424 Adams, K. L., Percifield, R., & Wendel, J. F. (2004). Organ-specific silencing of  
425 duplicated genes in a newly synthesized cotton allotetraploid. *Genetics*, *168*(4), 2217-  
426 2226.

427

428 Adams, K. L., & Wendel, J. F. (2005). Polyploidy and genome evolution in  
429 plants. *Current opinion in plant biology*, *8*(2), 135-141.



430

431 Ahuja, M. R. (2005). Polyploidy in gymnosperms: revisited. *Silvae Genetica*, 54(2), 59-  
432 68.

433

434 Ahuja, M. R. (2009). Genetic constitution and diversity in four narrow endemic redwoods  
435 from the family Cupressaceae. *Euphytica*, 165(1), 5-19.

436

437 Ahuja, M. R., & Neale, D. B. (2002). Origins of polyploidy in coast redwood (*Sequoia*  
438 *sempervirens* (D. Don) Endl.) and relationship of coast redwood to other genera of  
439 *Taxodiaceae*. *Silvae Genetica*, 51(2-3), 93-99.

440

441 Ahuja, M. R., & Neale, D. B. (2005). Evolution of genome size in conifers. *Silvae*  
442 *genetica*, 54(3), 126-137.

443

444 Allman, E. S., Degnan, J. H., & Rhodes, J. A. (2011). Identifying the rooted species tree  
445 from the distribution of unrooted gene trees under the coalescent. *Journal of mathematical*  
446 *biology*, 62(6), 833-862.

447

448 Ané, C., Larget, B., Baum, D. A., Smith, S. D., & Rokas, A. (2007). Bayesian estimation  
449 of concordance among gene trees. *Molecular Biology and Evolution*, 24(2), 412-426.

450

451 Barker, M. S., Kane, N. C., Matvienko, M., Kozik, A., Michelmore, R. W., Knapp, S. J.,  
452 & Rieseberg, L. H. (2008). Multiple paleopolyploidizations during the evolution of the  
453 *Compositae* reveal parallel patterns of duplicate gene retention after millions of  
454 years. *Molecular Biology and Evolution*, 25(11), 2445-2455.

455

456 Baum, D. A. (2007). Concordance trees, concordance factors, and the exploration of  
457 reticulate genealogy. *Taxon*, 417-426.

458

459 Beaulieu, J. M., Leitch, I. J., Patel, S., Pendharkar, A., & Knight, C. A. (2008). Genome  
460 size is a strong predictor of cell size and stomatal density in angiosperms. *New*  
461 *Phytologist*, 179(4), 975-986.

462

463 Brunsfeld, S. J., Soltis, P. S., Soltis, D. E., Gadek, P. A., Quinn, C. J., Streng, D. D., &  
464 Ranker, T. A. (1994). Phylogenetic relationships among the genera of Taxodiaceae and  
465 Cupressaceae: evidence from rbcL sequences. *Systematic Botany*, 253-262.

466

467 Burns RM, Honkala BH: Silvics of North America. In *Agriculture Handbook 654*. 2nd  
468 edition. Washington, DC: U.S: Department of Agriculture, Forest Service; 1990

469

470 Chaudhuri, P., & Marron, J. S. (1999). SiZer for exploration of structures in  
471 curves. *Journal of the American Statistical Association*, 94(447), 807-823.

472

473 Douhovnikoff, V., Cheng, A. M., & Dodd, R. S. (2004). Incidence, size and spatial  
474 structure of clones in second-growth stands of coast redwood, *Sequoia sempervirens*  
475 (Cupressaceae). *American Journal of Botany*, 91(7), 1140-1146.

476

477 Douhovnikoff, V., & Dodd, R. S. (2011). Lineage divergence in coast redwood (*Sequoia*  
478 *sempervirens*), detected by a new set of nuclear microsatellite loci. *The American Midland*  
479 *Naturalist*, 165(1), 22-37.

480

481 Doyle, J. (1945). Naming of the redwoods. *Nature*, 155, 254-257.

482

483 Eckenwalder, J. E. (1976). Re-evaluation of Cupressaceae and Taxodiaceae: a proposed  
484 merger. *Madrono*, 23(5), 237-256.

485

486 Edgar, R.C. (2004) MUSCLE: multiple sequence alignment with high accuracy and high  
487 throughput. *Nucleic Acids Res.* 32(5):1792-1797

488

489 Edgar, R.C. (2004) MUSCLE: a multiple sequence alignment method with reduced time  
490 and space complexity. *BMC Bioinformatics*, (5) 113

491

492 Fozuar, B. S., & Libby, W. J. (1968). Chromosomes of *Sequoia sempervirens*; 8-  
493 hydroxy-quinoline-castor oil pretreatment for improving preparation. *Biotechnic &*  
494 *Histochemistry*, 43(2), 97-100.

495

496 Gadek, P. A., Alpers, D. L., Heslewood, M. M., & Quinn, C. J. (2000). Relationships  
497 within Cupressaceae sensu lato: a combined morphological and molecular  
498 approach. *American Journal of Botany*, 87(7), 1044-1057.

499

500 Grabherr MG, Haas BJ, Yassour M, Levin JZ, Thompson DA, Amit I, Adiconis X, Fan  
501 L, Raychowdhury R, Zeng Q, Chen Z, Mauceli E, Hacohen N, Gnirke A, Rhind N, di  
502 Palma F, Birren BW, Nusbaum C, Lindblad-Toh K, Friedman N, Regev A. Full-length  
503 transcriptome assembly from RNA-seq data without a reference genome.

504

505 Haas, B. J., Papanicolaou, A., Yassour, M., Grabherr, M., Blood, P. D., Bowden, J., ... &  
506 Regev, A. (2013). De novo transcript sequence reconstruction from RNA-seq using the  
507 Trinity platform for reference generation and analysis. *Nature protocols*, 8(8), 1494-1512.

508

509 Huelsenbeck, J. P. and F. Ronquist. 2001. MRBAYES: Bayesian inference of phylogeny.  
510 *Bioinformatics* 17:754-755.

511

512 Ickert-Bond, S. M. 2003. Systematics of New World *Ephedra* L. (Ephedraceae):  
513 integrating morphological and molecular data. Ph.D. dissertation, Arizona State  
514 University, Tempe, Arizona, USA

515

516 Ishii, H. R., Azuma, W., Kuroda, K., & Sillett, S. C. 2014. Pushing the limits to tree  
517 height: could foliar water storage compensate for hydraulic constraints in *Sequoia*  
518 *sempervirens*?. *Functional Ecology*, 28(5), 1087-1093.

519

520 Jiao, Y., Wickett, N. J., Ayyampalayam, S., Chanderbali, A. S., Landherr, L., Ralph, P.  
521 E., ... & Leebens-Mack, J. (2011). Ancestral polyploidy in seed plants and  
522 angiosperms. *Nature*, 473(7345), 97-100.  
523  
524 Kent, W. J. (2002). BLAT—the BLAST-like alignment tool. *Genome research*, 12(4),  
525 656-664.  
526  
527 Khoshoo, T. N. (1959). Polyploidy in gymnosperms. *Evolution*, 24-39.  
528  
529 Kusumi, J., Tsumura, Y., Yoshimaru, H., & Tachida, H. (2000). Phylogenetic  
530 relationships in Taxodiaceae and Cupressaceae sensu stricto based on matK gene, chlL  
531 gene, trnL-trnF IGS region, and trnL intron sequences. *American Journal of*  
532 *Botany*, 87(10), 1480-1488.  
533  
534 Larget, B. R., Kotha, S. K., Dewey, C. N., & Ané, C. (2010). BUCKy: gene tree/species  
535 tree reconciliation with Bayesian concordance analysis. *Bioinformatics*, 26(22), 2910-  
536 2911.  
537  
538 Lechner, M., Findeiß, S., Steiner, L., Marz, M., Stadler, P. F., & Prohaska, S. J. (2011).  
539 Proteinortho: Detection of (Co-) orthologs in large-scale analysis. *BMC*  
540 *bioinformatics*, 12(1), 124.  
541  
542 Leslie, A. B., Beaulieu, J. M., Rai, H. S., Crane, P. R., Donoghue, M. J., & Mathews, S.  
543 (2012). Hemisphere-scale differences in conifer evolutionary dynamics. *Proceedings of*  
544 *the National Academy of Sciences*, 109(40), 16217-16221.  
545  
546 Ma, Q. W., Li, F. L., & Li, C. S. (2005). The coast redwoods (Sequoia, Taxodiaceae)  
547 from the Eocene of Heilongjiang and the Miocene of Yunnan, China. *Review of*  
548 *Palaeobotany and Palynology*, 135(3), 117-129.  
549

- 550 Mao, K., Milne, R. I., Zhang, L., Peng, Y., Liu, J., Thomas, P., ... & Renner, S. S. (2012).  
551 Distribution of living Cupressaceae reflects the breakup of Pangea. *Proceedings of the*  
552 *National Academy of Sciences*, 109(20), 7793-7798.
- 553
- 554 Mclachlan G, Peel D, Basford K, Adams P. 1999. The EMMIX software for the fitting of  
555 mixtures of normal and t- components. *J Stat Softw.* 4:2.
- 556 Miki, S., & Hikita, S. (1951). Probable chromosome number of fossil Sequoia and  
557 Metasequoia found in Japan. *Science*, 113(2923), 3-4.
- 558
- 559 Otto, S. P., & Whitton, J. (2000). Polyploid incidence and evolution. *Annual review of*  
560 *genetics*, 34(1), 401-437.
- 561
- 562 Parisod, C., Holderegger, R., & Brochmann, C. (2010). Evolutionary consequences of  
563 autopolyploidy. *New Phytologist*, 186(1), 5-17.
- 564
- 565 R Core Team (2013). R: A language and environment for statistical computing. R  
566 Foundation for Statistical Computing, Vienna, Austria. URL <http://www.R-project.org/>.
- 567
- 568 Ramsey, J., & Schemske, D. W. (2002). Neopolyploidy in flowering plants. *Annual*  
569 *review of ecology and systematics*, 589-639.
- 570
- 571 Rogers, D. L. (1997). Inheritance of allozymes from seed tissues of the hexaploid  
572 gymnosperm, *Sequoia sempervirens* (D. Don) Endl. (Coast redwood). *Heredity*, 78(2),  
573 166-175.
- 574
- 575 Rogers, D. L. (2000). Genotypic diversity and clone size in old-growth populations of  
576 coast redwood (*Sequoia sempervirens*). *Canadian Journal of Botany*, 78(11), 1408-1419.
- 577
- 578 Ronquist, F. and J. P. Huelsenbeck. 2003. MRBAYES 3: Bayesian phylogenetic  
579 inference under mixed models. *Bioinformatics* 19:1572-1574.
- 580

- 581 Saylor, L. C., & Simons, H. A. (1970). Karyology of *Sequoia sempervirens*: karyotype  
582 and accessory chromosomes. *Cytologia*, 35(2), 294-303.
- 583
- 584 Schlarbaum, S. E., & Tsuchiya, T. (1984). Cytotaxonomy and phylogeny in certain  
585 species of Taxodiaceae. *Plant systematics and evolution*, 147(1-2), 29-54.
- 586
- 587 Schlarbaum, S. E., Tsuchiya, T., & Johnson, L. C. (1984). The chromosomes and  
588 relationships of *Metasequoia* and *Sequoia* (Taxodiaceae): an update. *Journal of the Arnold*  
589 *Arboretum*, 65(2), 251-254.
- 590
- 591 Schulz, C., & Stützel, T. (2007). Evolution of taxodiaceous Cupressaceae  
592 (Coniferopsida). *Organisms Diversity & Evolution*, 7(2), 124-135.
- 593
- 594 Silla, F., Fraver, S., Lara, A., Allnutt, T. R., & Newton, A. (2002). Regeneration and  
595 stand dynamics of *Fitzroya cupressoides* (Cupressaceae) forests of southern Chile's  
596 Central Depression. *Forest Ecology and Management*, 165(1), 213-224.
- 597
- 598 Stamatakis, A. (2006). RAxML-VI-HPC: maximum likelihood-based phylogenetic  
599 analyses with thousands of taxa and mixed models. *Bioinformatics*, 22(21), 2688-2690.
- 600
- 601 Stebbins, G. L. (1947). Types of polyploids: their classification and  
602 significance. *Advances in genetics*, 1, 403-29.
- 603
- 604 Stebbins, G. L. (1948). The chromosomes and relationships of *Metasequoia* and  
605 *Sequoia*. *Science*, 108(2796), 95-98.
- 606
- 607 Vanneste, K., Van de Peer, Y., & Maere, S. (2013). Inference of genome duplications  
608 from age distributions revisited. *Molecular biology and evolution*, 30(1), 177-190.
- 609
- 610 Wolfe, K. H. (2001). Yesterday's polyploids and the mystery of diploidization. *Nature*  
611 *Reviews Genetics*, 2(5), 333-341.

612

613 Woodhouse, M. R., Cheng, F., Pires, J. C., Lisch, D., Freeling, M., & Wang, X. (2014).

614 Origin, inheritance, and gene regulatory consequences of genome dominance in

615 polyploids. *Proceedings of the National Academy of Sciences*, 111(14), 5283-5288.

616

617 Yang, Z. 1997. PAML: a program package for phylogenetic analysis by maximum

618 likelihood

619 Computer Applications in BioSciences 13:555-556.

620

621 Yang, Z. 2007. PAML 4: a program package for phylogenetic analysis by maximum

622 likelihood. *Molecular Biology and Evolution* 24: 1586-1591

623

624 Yang, Z. Y., Ran, J. H., & Wang, X. Q. (2012). Three genome-based phylogeny of

625 Cupressaceae sl: Further evidence for the evolution of gymnosperms and Southern

626 Hemisphere biogeography. *Molecular phylogenetics and evolution*, 64(3), 452-470.

627

628 Zhang Z, Li J, Zhao XQ, Wang J, Wong GK, Yu J: KaK<sub>s</sub> Calculator: Calculating Ka and

629 K<sub>s</sub> through model selection and model averaging. *Genomics Proteomics*

630 *Bioinformatics* 2006 , 4:259-263.

631

632
